# Supplementary material for: Intrahepatic Mass-Forming Cholangiocarcinoma: Is There Additional Prognostic Value in Using Gd-EOB Enhanced MRI?
Source: MDPI journal article supplement (doi:10.3390/cancers16071314), 2024-03-28
Supplement: s1 [file s1]

## Supplementary Materials

| Sequence                                | Orientation | TR (ms) | TE (ms) | Flip Angle (°) | Matrix | Slice (mm) |
|-----------------------------------------|-------------|---------|---------|----------------|--------|------------|
| T1 VIBE Dual Echo                       | Axial       | 6.6     | 2.4     | 10             | 320    | 3          |
| T1 VIBE FS unenhanced                   | Axial       | 4.3     | 2.1     | 9              | 320    | 3          |
| T1 VIBE FS (high flip angle) unenhanced | Axial       | 6.7     | 2.4     | 25             | 320    | 3          |
| T1 VIBE FS arterial                     | Axial       | 4.3     | 2.1     | 9              | 320    | 3          |
| T1 VIBE FS portovenous                  | Axial       | 4.3     | 2.1     | 9              | 320    | 3          |
| T1 VIBE FS delayed                      | Axial       | 4.3     | 2.1     | 9              | 320    | 3          |
| T2 HASTE                                | Axial       | 1400    | 94      |                | 352    | 6          |
| T2 TSE FS                               | Axial       | 7964    | 102     |                | 512    | 6          |
| DWI EPI (b = 50, 400, 800)              | Axial       | 2000    | 55      |                | 128    | 6          |
| T1 FL2D                                 | Axial       | 195     | 4.8     | 70             | 320    | 6          |
| T1 VIBE FS hepatobiliary                | Axial       | 4.3     | 2.1     | 9              | 320    | 3          |
| T1 VIBE FS high flip angle              | Axial       | 6.7     | 2.4     | 25             | 320    | 3          |
| T1 VIBE FS hepatobiliary                | Coronal     | 7.1     | 2.4     | 30             | 288    | 2          |
| T1 VIBE FS hepatobiliary                | Sagittal    | 7.2     | 4.8     | 30             | 320    | 2          |

**Supplementary Table S1:** Representative MRI acquisition parameters for Gd-EOB-enhanced MRI at 1.5T. All sequences except DWI are acquired in breath-hold. TR: repetition time. TE: echo time. VIBE: Volumetric interpolated breath-hold examination. FS: fat saturation. DWI: diffusion-weighted imaging. EPI: echoplanar imaging. HASTE: half fourier single-shot Turbo spin-Echo. FL2D: fast low angle shot, 2-dimensional.
